# Supplementary material for: An evaluation of live porcine simulation training for robotic surgery
Source: PubMed Central journal article supplement (PMC8134281; doi:10.1007/s11701-020-01113-3), 2020-07-11
Supplement: 11701_2020_1113_MOESM1_ESM.pdf [file 11701_2020_1113_MOESM1_ESM.pdf]

1. Level of training at the time of completing the Aalborg course (most recent if multiple visits)

2. Your Speciality



3. In which country do you practice ?



4. Before completing the course, how would you have rated your robotic surgical skill?

Complete novice Expert robotic surgeon

5. Before completing the course, how confident were you in performing robotic surgery?

Not at all confident Completely confident

6. Before the course, approximately how many robotic procedures had you been involved in as console surgeon?

0 100+

7. Before the course, had you undertaken any other training in robotic surgery?

- |                                                                |                                                          |
|----------------------------------------------------------------|----------------------------------------------------------|
| <input type="checkbox"/> e-Learning                            | <input type="checkbox"/> Cadaveric training              |
| <input type="checkbox"/> Virtual Reality Simulation            | <input type="checkbox"/> Live animal training            |
| <input type="checkbox"/> Robotic training using plastic models | <input type="checkbox"/> Modular operating room training |



13. How realistic was training on the porcine models (appearance and tissue characteristics) in comparison to the operating room

Not at all realistic Exactly like the OR



14. Training on porcine models taught useful skills that were transferable to the operating room

Completely disagree Completely agree



15. Following this course, what further robotic training have you undertaken (please select all applicable)?

- |                                                                      |                                                  |
|----------------------------------------------------------------------|--------------------------------------------------|
| <input type="checkbox"/> I had no further robotic training           | <input type="checkbox"/> Cadaveric Training      |
| <input type="checkbox"/> Virtual Reality Simulation Training         | <input type="checkbox"/> Live animal training    |
| <input type="checkbox"/> Training with the robotic on plastic models | <input type="checkbox"/> Operating room training |

16. How could the course be improved?

17. Please give any further comments on the training received

18. Do you currently perform robotic surgery?

- I no longer perform robotic surgery
- I am currently training in robotic surgery
- I perform robotic surgery independently
